# Supplementary material
Source: PubMed Central journal article supplement (PMC11072251)
Supplement: 18_2022_4649_MOESM1_ESM.pdf [file 18_2022_4649_MOESM1_ESM.pdf]

## **Deleting interleukin-10 from myeloid cells exacerbates atherosclerosis in *ApoE*<sup>-/-</sup> mice.**

Marco Orecchioni<sup>1\*</sup>, Dennis Wolf<sup>2</sup>, Vasantika Suryawanshi<sup>1</sup>, Holger Winkels<sup>3</sup>, Kouji Kobiyama<sup>4</sup>, Jeffrey Makings<sup>1</sup>, William B. Kiosses<sup>5</sup>, and Klaus Ley<sup>\*1,6,7</sup>

### **Affiliations**

<sup>1</sup> La Jolla Institute for Immunology, La Jolla, CA 92037 USA

<sup>2</sup> Cardiology and Angiology I, Medical Center – University of Freiburg, Faculty of Medicine, University of Freiburg, Germany

<sup>3</sup> Department of Cardiology, Faculty of Medicine and University Hospital Cologne, University of Cologne, Cologne, Germany

<sup>4</sup> Division of Vaccine Science, Department of Microbiology and Immunology, The Institute of Medical Science, The University of Tokyo, Japan

<sup>5</sup> Histology and Microscopy Core Facility, La Jolla Institute for Immunology, La Jolla, CA 92037 USA

<sup>6</sup> Department of Bioengineering, University of California San Diego, La Jolla, CA, 92093, USA

<sup>7</sup> Immunology Center of Georgia (IMMCG), Augusta University, Augusta, GA, 30912 USA

\* Contacts: Marco Orecchioni Ph.D., Instructor, La Jolla Institute for Immunology, 9420 Athena Circle Drive, La Jolla, CA 92037, USA, (858) 405-3781 (tel.), [morecchioni@lji.org](mailto:morecchioni@lji.org); Klaus Ley, M.D., Co-Director, Immunology Center of Georgia (IMMCG). Professor of Physiology, Augusta University, 1410 Laney Walker Blvd, CN4315 Augusta, GA 30912; (858)-472-7253 (tel.); email [kley@augusta.edu](mailto:kley@augusta.edu)

## **Supplementary Figures**

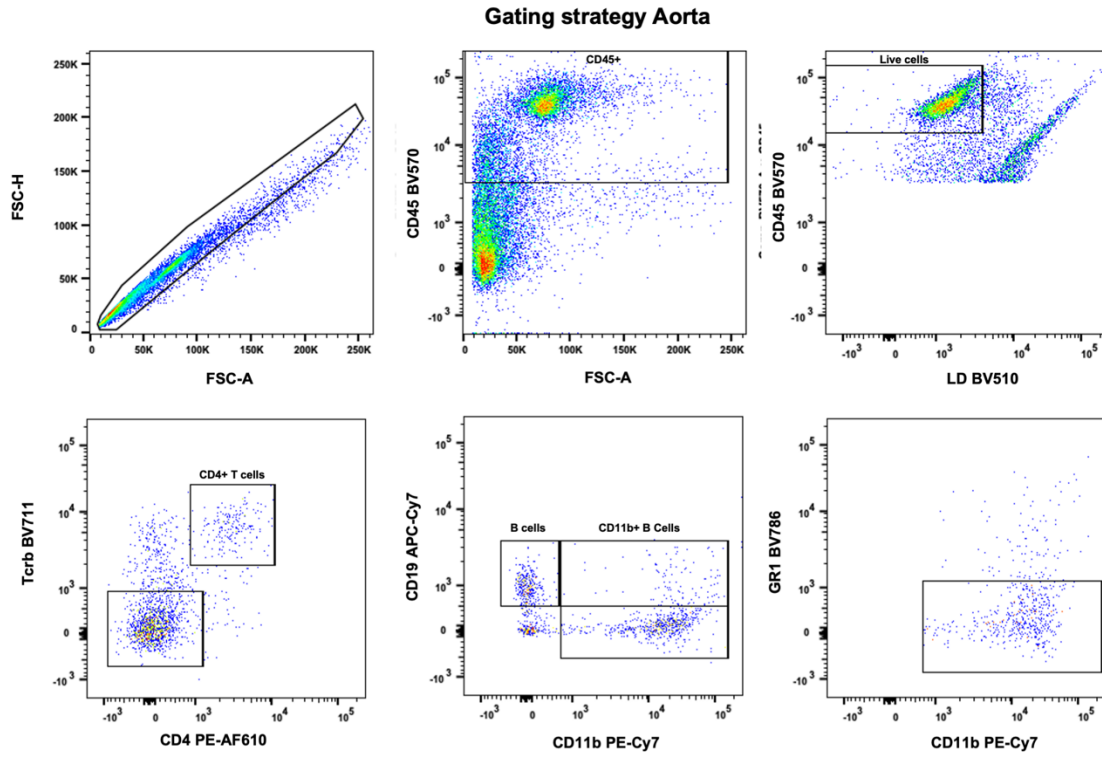

**Figure S1. Aorta gating strategy.** Applied gating strategy for the identification of the aortic immune cells shown as a dot plots.

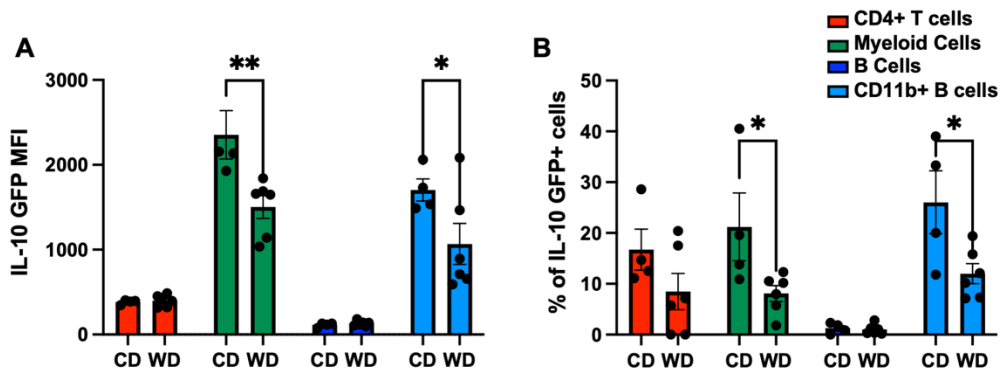

**Figure S2. IL-10 expression decreases in WD fed *Vert-X Apoe<sup>-/-</sup>* aortic leukocytes.** IL-10 GFP<sup>+</sup> expression reported as **A**) MFI or **B**) % of parent cell type in leukocyte from aorta of *Vert-X Apoe<sup>-/-</sup>* mice challenged with a lipid-rich diet (WD 8 weeks, n= 5) or kept in chow diet (CD 16 weeks, n= 5). Data are presented as mean ± SEM. P value was calculated by Two-way Anova test with Tuckey's correction for multiple comparison \* p < 0.05, \*\* p < 0.01.

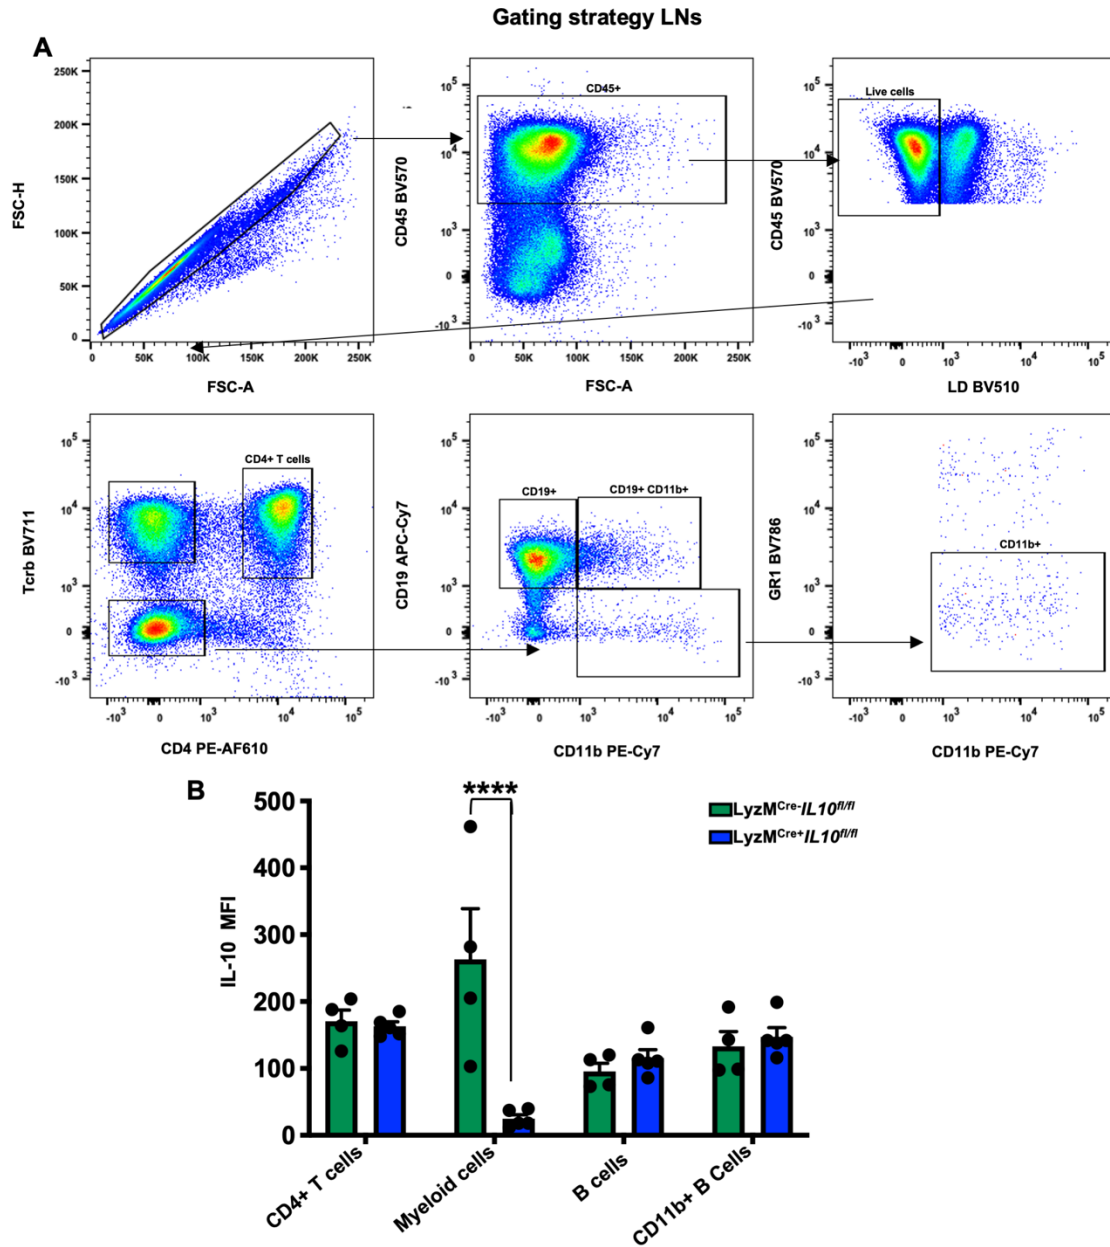

**Figure S3. LNs gating strategy and myeloid IL-10 depletion specificity in *LyzM<sup>Cre+</sup>IL10<sup>fl/fl</sup> Apoe<sup>-/-</sup>* mice. **A**) Gating strategy applied for the identification of the main LN leukocyte populations shown as a dot plots. **B**) IL-10 intracellular staining in LNs harvested from in *LyzM<sup>Cre+</sup>IL10<sup>fl/fl</sup> Apoe<sup>-/-</sup>* or *LyzM<sup>Cre-</sup>IL10<sup>fl/fl</sup> Apoe<sup>-/-</sup>* mice (n= 4). Data are presented as mean ± SEM. P value was calculated by Two-way Anova test with Tuckey's correction for multiple comparison. \*\*\*\* p < 0.0001.**

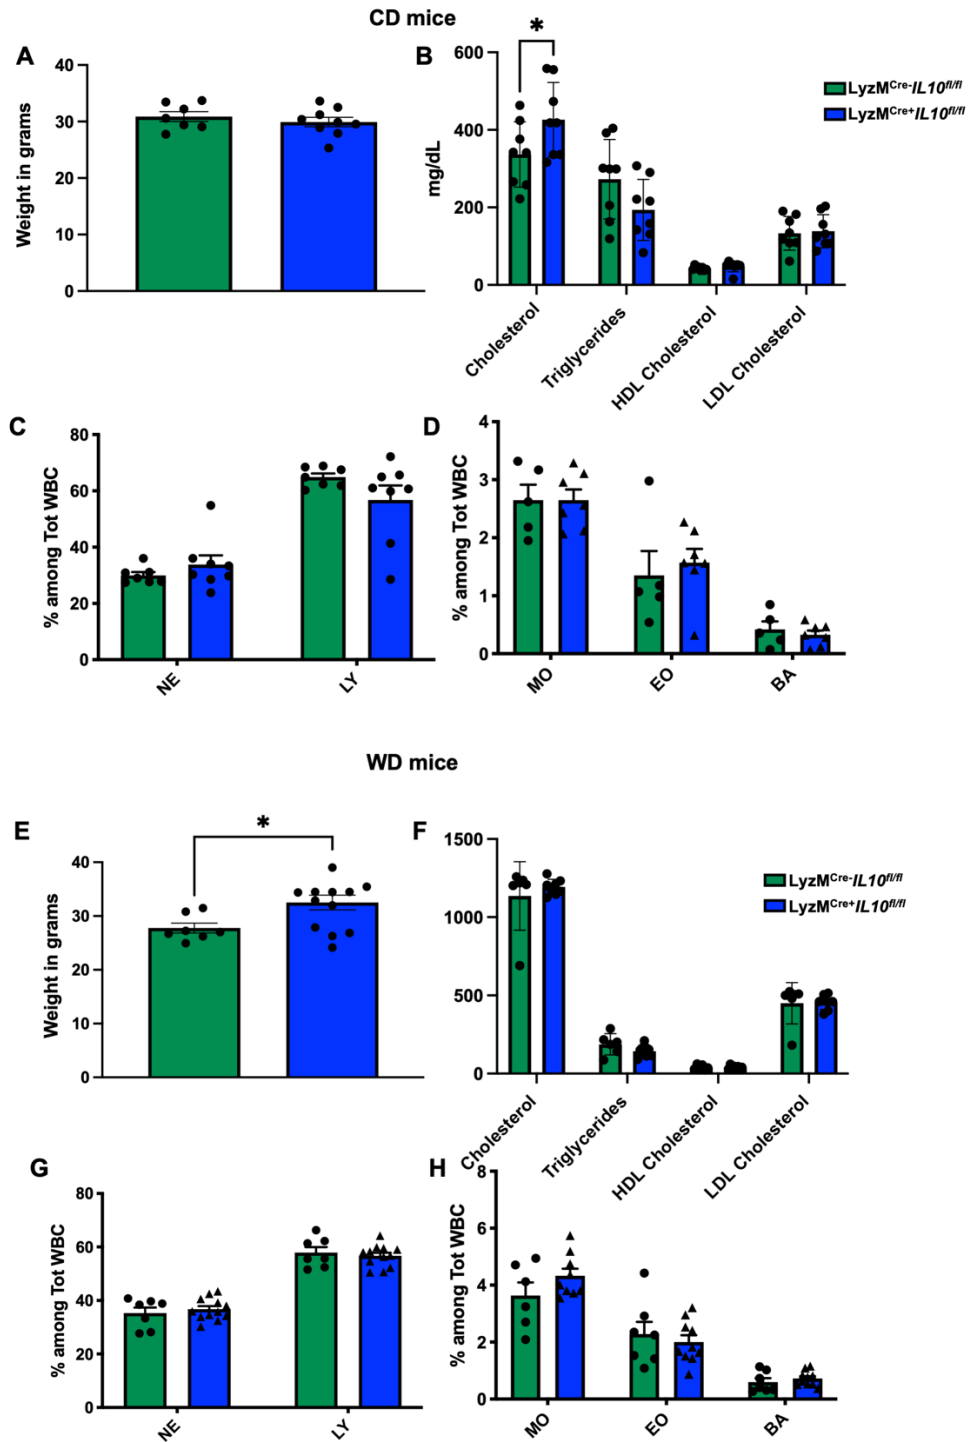

**Figure S4. Body weight and hematological parameters.** A-G) Body weight, plasma lipid content and hematological parameters analysis from *LyzM<sup>Cre</sup>+IL10<sup>fl/fl</sup> Apoe<sup>-/-</sup>* or *LyzM<sup>Cre</sup>-IL10<sup>fl/fl</sup> Apoe<sup>-/-</sup>* mice fed A-D) CD for 25 weeks (n= 5/8) or E-H) WD for 12 weeks (n= 8/11). Neutrophils (NE), Lymphocytes (LY), Monocytes (MO), Eosinophils (EO) and Basophils (BA) % among total white blood cells is reported. P value was calculated by two-way Anova with Tukey's correction for multiple comparison test. \* p < 0.05.
